# Supplementary material for: Analysis of Thioredoxins and Glutaredoxins in Soybean: Evidence of Translational Regulation under Water Restriction
Source: Antioxidants (Basel). 2022 Aug 21;11(8):1622. doi: 10.3390/antiox11081622 (PMC9405309; doi:10.3390/antiox11081622)
Supplement: Supplementary file 1 [file antioxidants-11-01622-s001.zip]

Archive with 4 entries (4 files):
- antioxidants-1849242-supplementary.pdf
- Table S1.xlsx
- Table S2.xlsx
- Table S3.xlsx
