# Supplementary material for: Analysis of Thioredoxins and Glutaredoxins in Soybean: Evidence of Translational Regulation under Water Restriction
Source: Antioxidants (Basel). 2022 Aug 21;11(8):1622. doi: 10.3390/antiox11081622 (PMC9405309; doi:10.3390/antiox11081622)
Supplement: Supplementary file 1 [file antioxidants-11-01622-s001.zip › Table S1.xlsx]

## Sheet: GmTrx
ProtID_trx	GmTrx	TranscID_Trx	GeneID	Class	Chromosome	Chromosome #	pb_start	pb_end	# Exons	Arrangement in chromosomes	pI	pmw_gs_mol	Localization	Domain	Length (aa)	Status
XP_003517423.1	GmTrx58	XM_003517375.5	LOC100817252	Lilium	NC_016088.4	1	342834	346292	4		8.65193	23.7743	Chloroplast.	thio	212
NP_001237762.1	GmTrx32	NM_001250833.1	LOC100527298	h II	NC_016088.4	1	4384253	4385402	3	clustered	9.18541	15.8199	Cytoplasm.	thio	138	DEG
XP_003517914.1	GmTrx59	XM_003517866.5	LOC100817095	h II	NC_016088.4	1	4395631	4396659	3	clustered	8.49275	14.0542	Cytoplasm.	thio	124
NP_001236052.1	GmTrx10	NM_001249123.1	LOC100527691	h II	NC_016088.4	1	4412597	4413990	3	clustered	7.74501	14.4277	Cytoplasm.	thio	126	DEG
NP_001237535.2	GmTrx28	NM_001250606.2	LOC100127412	h I	NC_016088.4	1	51878843	51882106	3		5.36726	13.2751	Cytoplasm.	thio	120	DEG
XP_003517272.1	GmTrx57	XM_003517224.4	LOC100779657	HCF164	NC_016088.4	1	52920658	52922653	4		6.10059	28.1554	Chloroplast. Cytoplasm. Nucleus.	thio	252
NP_001236300.2	GmTrx14	NM_001249371.2	LOC100037471	PDIA6	NC_016089.4	2	1270861	1275936	11		5.45413	40.4304	Endoplasmic reticulum.	thio, ER	364
XP_003519128.1	GmTrx60	XM_003519080.4	LOC100817994	h II	NC_016089.4	2	2067166	2068612	3	clustered	8.81616	14.5218	Cytoplasm.	thio	127
XP_003519131.1	GmTrx61	XM_003519083.5	LOC100820138	h II	NC_016089.4	2	2077805	2078858	3	clustered	7.79385	14.4716	Cytoplasm.	thio	128
NP_001240862.1	GmTrx48	NM_001253933.1	LOC100776312	h II	NC_016089.4	2	2092935	2094088	3	clustered	8.49101	15.6928	Cytoplasm.	thio	138	DEG
NP_001236186.1	GmTrx12	NM_001249257.1	LOC100305749	PLP3	NC_016089.4	2	4847436	4849988	9		5.16064	26.1412	Nucleus.	thio	231
NP_001242527.2	GmTrx50	NM_001255598.2	LOC100813728	APR5	NC_016089.4	2	6327878	6331107	4		9.26471	33.882	Chloroplast.	thio	299
NP_001237674.1	GmTrx30	NM_001250745.2	LOC100500413	M	NC_016089.4	2	9639234	9641531	2		8.68111	18.9469	Chloroplast.	thio	169
NP_001238403.1	GmTrx38	NM_001251474.2	LOC100527081	WCRKC	NC_016089.4	2	20105304	20110918	5		7.62742	22.3444	Chloroplast.	thio	198
XP_014623679.1	GmTrx117	XM_014768193.3	LOC100794561	NTRC	NC_016089.4	2	34570983	34582046	10		6.23083	57.2564	Mitochondrion.	thio, PNDO	524
XP_003519441.1	GmTrx62	XM_003519393.5	LOC100811253	PDI-2-3	NC_016089.4	2	46966202	46970179	9		5.36809	47.8272	Chloroplast.	thio	438
NP_001237133.1	GmTrx25	NM_001250204.2	LOC100527258	h III	NC_016090.4	3	199877	203222	5		5.01863	15.5035	Cytoplasm.	thio	137
NP_001239801.1	GmTrx44	NM_001252872.1	LOC100783648	WCRKC	NC_016090.4	3	37327187	37329576	5		8.566	22.2085	Chloroplast.	thio	189
XP_003521666.1	GmTrx63	XM_003521618.5	LOC100796355	PDIA6	NC_016090.4	3	44494813	44498307	11		5.70188	39.868	Endoplasmic reticulum.	thio, ER	362
NP_001276271.2	GmTrx52	NM_001289342.2	LOC100815038	Nucleoredoxin	NC_016091.4	4	1649213	1655690	3		5.6982	47.7657	Cytoplasm.	thio_like, C1	423	DEG
NP_001336743.1	GmTrx53	NM_001349814.1	LOC100500609	h I	NC_016091.4	4	2303128	2305109	3		5.24225	13.0932	Cytoplasm.	thio	117
XP_003523931.1	GmTrx68	XM_003523883.3	LOC100812907	Lilium	NC_016091.4	4	3072544	3075932	4		5.91302	24.4729	Chloroplast.	thio	215
XP_003522672.1	GmTrx64	XM_003522624.5	LOC100791971	Nucleoredoxin	NC_016091.4	4	6443767	6446791	4		5.32394	44.3373	Chloroplast. Cytoplasm. Nucleus.	thio_like, C1	389	DEG
XP_040871068.1	GmTrx123	XM_041015134.1	LOC100814500	APR4	NC_016091.4	4	9270196	9274247	4	clustered	8.97038	36.1172	Chloroplast.	thio	322
XP_040871069.1	GmTrx124	XM_041015135.1	LOC100815032	APR4	NC_016091.4	4	9303179	9306651	5	clustered	8.72463	38.3039	Chloroplast.	thio	342
XP_003523822.1	GmTrx67	XM_003523774.5	LOC100787041	TTL	NC_016091.4	4	9592480	9596338	7		9.29899	73.1518	Nucleus.	thio, TPR	654
XP_003522899.1	GmTrx65	XM_003522851.5	LOC100784029	Cf6I	NC_016091.4	4	18966315	18973679	4		6.64691	21.9303	Chloroplast.	thio	192
XP_003523014.1	GmTrx66	XM_003522966.5	LOC100801871	Lilium	NC_016091.4	4	40876852	40878745	4		8.66607	29.545	Chloroplast.	thio	271
NP_001235935.2	GmTrx08	NM_001249006.2	LOC100500292	M	NC_016091.4	4	49816510	49818413	2		8.82759	19.9398	Chloroplast.	thio	181
NP_001238009.1	GmTrx35	NM_001251080.1	LOC100170705	PDI-1-1	NC_016091.4	4	50329773	50333813	10		5.05669	58.7141	Endoplasmic reticulum.	thio, thio_like	525
XP_003524813.1	GmTrx69	XM_003524765.4	LOC100799935	O	NC_038241.2	5	32596920	32600061	7		9.61203	20.2151	Chloroplast.	thio	182
XP_003527521.1	GmTrx74	XM_003527473.5	LOC100808125	Nucleoredoxin	NC_038242.2	6	1589208	1596396	3		5.49046	49.1793	Cytoplasm. Nucleus.	thio_like, C1	434	DEG
XP_003527904.1	GmTrx75	XM_003527856.5	LOC100499879	h I	NC_038242.2	6	2210297	2212141	3		5.64888	12.978	Cytoplasm.	thio	117
NP_001351129.1	GmTrx56	NM_001364200.1	LOC100809735	Lilium	NC_038242.2	6	2994948	2997672	4		6.66262	25.4169	Chloroplast. Nucleus.	thio	222
XP_003526462.1	GmTrx71	XM_003526414.5	LOC100778160	Nucleoredoxin	NC_038242.2	6	6016224	6019245	4		5.37633	44.4566	Nucleus.	thio_like, C1	389	DEG
NP_001240132.1	GmTrx47	NM_001253203.2	LOC100796765	APR4	NC_038242.2	6	8138307	8142410	4	clustered	7.69807	35.0697	Chloroplast. Nucleus.	thio	314
XP_006581537.1	GmTrx108	XM_006581474.4	LOC100810620	APR4	NC_038242.2	6	8158194	8162410	4	clustered	8.92965	36.1856	Chloroplast.	thio	321
XP_003527909.1	GmTrx76	XM_003527861.5	LOC100814381	TTL	NC_038242.2	6	8305669	8309750	7	clustered	9.22684	77.9676	Nucleus.	thio, TPR	698
XP_006581588.1	GmTrx109	XM_006581525.4	LOC100788687	PDI-1-1	NC_038242.2	6	9288786	9292721	10		4.88261	56.1144	Endoplasmic reticulum.	thio, thio_like	503
NP_001237660.1	GmTrx29	NM_001250731.2	LOC100305596	M	NC_038242.2	6	9860897	9862376	2		8.8816	20.0358	Chloroplast.	thio	181
NP_001240909.1	GmTrx49	NM_001253980.2	LOC100800129	Lilium	NC_038242.2	6	17386857	17388561	4		8.73625	29.4849	Chloroplast.	thio	271
XP_014632474.1	GmTrx118	XM_014776988.2	LOC100783550	PDIA6	NC_038242.2	6	22171104	22174395	11		5.28475	35.9114	Endoplasmic reticulum.	thio, ER	324
XP_003525985.1	GmTrx70	XM_003525937.5	LOC100799577	TTL	NC_038242.2	6	35249091	35253240	7		8.84892	73.5609	Nucleus.	thio, TPR	678
XP_003527258.1	GmTrx72	XM_003527210.5	LOC100802971	M	NC_038242.2	6	40815085	40818346	2		9.39809	18.3722	Chloroplast.	thio	169
NP_001237912.2	GmTrx34	NM_001250983.2	LOC100306379	h III	NC_038242.2	6	45063393	45065206	3		9.45556	14.3566	Cytoplasm.	thio	126
XP_003527321.1	GmTrx73	XM_003527273.5	LOC100793435	PDI-5-4	NC_038242.2	6	45496650	45506753	15		6.55506	53.6302	Chloroplast.	thio, ER	480
XP_003529085.1	GmTrx77	XM_003529037.4	LOC100787640	Lilium	NC_038243.2	7	15250028	15255130	4		8.90487	24.546	Chloroplast.	thio	219
NP_001238639.2	GmTrx42	NM_001251710.2	LOC100306680	M	NC_038243.2	7	38891462	38893989	2		9.09716	19.5175	Chloroplast.	thio	174
XP_003529636.1	GmTrx78	XM_003529588.5	LOC100819536	APR3	NC_038243.2	7	43974208	43976355	5		6.49451	51.7842	Chloroplast.	thio, PPRed	466
XP_040873898.1	GmTrx125	XM_041017964.1	LOC100789778	TDX	NC_038244.2	8	4271186	4277998	9		5.91985	46.5228	Chloroplast. Nucleus.	thio, TPR, HSP70	421
NP_001235135.1	GmTrx01	NM_001248206.1	LOC100500492	O	NC_038244.2	8	6595006	6598035	7		9.47908	20.1749	Chloroplast.	thio	182
XP_003532006.1	GmTrx79	XM_003531958.5	LOC100809224	Nucleoredoxin	NC_038244.2	8	38982102	38985731	4		4.85558	64.2119	Cytoplasm. Nucleus.	thio_like, C1	570
NP_001238074.1	GmTrx37	NM_001251145.2	LOC100527572	h II	NC_038244.2	8	40466158	40467363	3		8.90687	13.9231	Cytoplasm.	thio	121
NP_001235612.1	GmTrx05	NM_001248683.2	LOC547630	APR3	NC_038245.2	9	351223	354284	5		5.94793	51.9651	Chloroplast.	thio, PPRed	470
NP_001237694.1	GmTrx31	NM_001250765.2	LOC100527038	HCF164	NC_038245.2	9	2384361	2387676	2		8.80275	21.0319		thio	193
NP_001237440.1	GmTrx27	NM_001250511.1	LOC547759	h II	NC_038245.2	9	46701521	46702122	3	clustered	6.08297	14.8298	Cytoplasm.	thio	135
XP_003534466.1	GmTrx80	XM_003534418.5	LOC100803391	h II	NC_038245.2	9	46704812	46705682	3	clustered	6.90062	14.7698	Cytoplasm.	thio	131
NP_001235872.1	GmTrx07	NM_001248943.1	LOC100499776	F	NC_038245.2	9	47412426	47415121	3		8.89285	19.6334	Chloroplast.	thio	181
XP_003534633.1	GmTrx81	XM_003534585.5	LOC100803572	h III	NC_038245.2	9	49341192	49345359	5		4.96613	15.5915	Cytoplasm.	thio	139
NP_001236289.1	GmTrx13	NM_001249360.1	LOC100037470	PDIA6	NC_038246.2	10	1311386	1315798	11		5.72778	40.3553	Endoplasmic reticulum.	thio, ER	364
XP_003535866.1	GmTrx82	XM_003535818.5	LOC100819254	NTRC	NC_038246.2	10	27187812	27200577	10		6.42016	56.6107	Mitochondrion.	thio, PNDO	519
XP_040862052.1	GmTrx120	XM_041006118.1	LOC121172935	h III	NC_038246.2	10	28214467	28216447	3		9.57277	14.4167	Cytoplasm.	thio	126
XP_003536390.1	GmTrx83	XM_003536342.5	LOC100791778	PDI-5-2	NC_038246.2	10	45004499	45009508	5		4.89453	49.2397	Chloroplast.	thio, thio_like	433
NP_001237043.1	GmTrx24	NM_001250114.2	LOC100306580	Y	NC_038246.2	10	45569487	45572034	5		9.11849	19.4311	Chloroplast.	thio	175
XP_003536596.1	GmTrx84	XM_003536548.5	LOC100814116	TXNDC9	NC_038246.2	10	48636367	48639011	3		5.44264	24.4344	Nucleus.	thio	213
XP_040861900.1	GmTrx119	XM_041005966.1	LOC100792834	QSOX2	NC_038246.2	10	49022375	49028636	11		8.39832	59.8017	Chloroplast.	thio, ERV1	528
NP_001236422.1	GmTrx17	NM_001249493.2	LOC100500584	X	NC_038246.2	10	50606463	50609111	2		8.3496	19.9366	Chloroplast.	thio	181
NP_001238579.1	GmTrx40	NM_001251650.2	LOC100499701	h I	NC_038247.2	11	5439840	5442315	3		5.36055	13.16	Cytoplasm.	thio	120
XP_003538207.1	GmTrx85	XM_003538159.4	LOC100790223	PDI-1-4	NC_038247.2	11	17518669	17523157	12		4.63684	64.883	Chloroplast. Nucleus.	thio, thio_like	586
NP_001236369.1	GmTrx16	NM_001249440.2	LOC100500580	Cf6I	NC_038247.2	11	19095703	19101185	4		7.048	22.3878	Chloroplast. Cytoplasm.	thio	194
XP_003539709.1	GmTrx87	XM_003539661.5	LOC100785630	PDI-1-4	NC_038248.2	12	4946009	4949986	12		4.69165	64.2765	Chloroplast. Nucleus.	thio, thio_like	579
XP_014620380.1	GmTrx116	XM_014764894.3	LOC100787595	PDI-5-4	NC_038248.2	12	15558633	15568558	15		6.81473	53.6955	Chloroplast.	thio, ER	480
NP_001236552.1	GmTrx20	NM_001249623.2	LOC100500083	h III	NC_038248.2	12	16009160	16010837	3		9.30095	14.3475	Cytoplasm.	thio	126
XP_003540097.2	GmTrx88	XM_003540049.5	LOC100818054	M	NC_038248.2	12	21898199	21901546	2		9.63036	26.1542	Chloroplast.	thio	237
XP_003556806.1	GmTrx107	XM_003556758.5	LOC100805790	TTL	NC_038248.2	12	29687998	29692154	7		9.00313	73.7823	Nucleus.	thio, TPR	676
NP_001238028.1	GmTrx36	NM_001251099.1	PDIL-2	PDI-1-4	NC_038248.2	12	34415019	34419324	12		4.69061	61.6108	Chloroplast.	thio, thio_like	551
XP_003539551.1	GmTrx86	XM_003539503.5	LOC100783860	TTL	NC_038248.2	12	38388925	38392503	7		8.87211	64.0755	Nucleus.	thio, TPR	586
XP_006592878.1	GmTrx110	XM_006592815.4	LOC100809522	PDI-5-4	NC_038248.2	12	38667976	38675742	14		6.68105	55.5676	Chloroplast.	thio, ER	493
NP_001239956.1	GmTrx46	NM_001253027.2	LOC100813627	h III	NC_038248.2	12	38889937	38891419	3		7.01743	14.4816	Cytoplasm.	thio	126
NP_001236067.1	GmTrx11	NM_001249138.2	LOC100526924	M	NC_038248.2	12	39751145	39754393	2		9.12999	19.7647	Chloroplast.	thio	182
XP_006592931.1	GmTrx111	XM_006592868.4	LOC100804531	TTL	NC_038248.2	12	40338982	40343071	7		8.97196	76.2868	Nucleus.	thio, TPR	698
XP_006593605.1	GmTrx112	XM_006593542.4	LOC100789569	PDI-1-1	NC_038249.2	13	17301082	17306730	11		5.32155	55.6993	Endoplasmic reticulum.	thio, thio_like	495
XP_003543765.1	GmTrx92	XM_003543717.4	LOC100791862	TTL	NC_038249.2	13	19252528	19256596	7		9.39363	78.6797	Nucleus.	thio, TPR	703	DEG
NP_001236426.1	GmTrx18	NM_001249497.2	LOC100306280	h III	NC_038249.2	13	35245761	35248626	3		4.61043	13.8207	Cytoplasm.	thio	125
XP_003541820.1	GmTrx89	XM_003541772.5	LOC100795358	TTL	NC_038249.2	13	36683232	36687237	7		8.75092	75.7281	Nucleus.	thio, TPR	692
XP_006594773.1	GmTrx113	XM_006594710.4	LOC100811845	M	NC_038249.2	13	37302819	37305510	2		9.11563	19.5672	Chloroplast.	thio	182
NP_001237001.1	GmTrx23	NM_001250072.2	LOC100499858	h III	NC_038249.2	13	38088296	38089838	3	clustered	5.93272	14.055	Chloroplast. Cytoplasm.	thio	122	DEG
XP_003543298.1	GmTrx91	XM_003543250.5	LOC100806869	PDI-5-4	NC_038249.2	13	38274021	38281942	15	clustered	7.32989	53.8405	Chloroplast.	thio, ER	480
XP_003541889.1	GmTrx90	XM_003541841.5	LOC100792373	TTL	NC_038249.2	13	38508352	38511637	7		9.00759	63.9154	Nucleus.	thio, TPR	584
XP_040864436.1	GmTrx121	XM_041008502.1	LOC100804924	PDI-1-4	NC_038249.2	13	41496567	41500955	11	clustered	4.72193	65.9425	Chloroplast. Nucleus.	thio, thio_like	589
NP_001239828.1	GmTrx45	NM_001252899.2	LOC100814374	PDI-5-1	NC_038249.2	13	41667875	41670404	5	clustered	5.10912	16.847	Chloroplast.	thio	147
NP_001235697.1	GmTrx06	NM_001248768.3	LOC100305460	PDI-1-6	NC_038249.2	13	43915319	43920457	12		5.11744	58.6295	Chloroplast. Cytoplasm.	thio, thio_like	520
NP_001236576.1	GmTrx21	NM_001249647.1	PDIM-1	PDI-2-3	NC_038250.2	14	3947990	3951827	9		5.40569	47.6501	Chloroplast. Cytoplasm.	thio	438
NP_001236031.1	GmTrx09	NM_001249102.2	LOC100306506	h I	NC_038250.2	14	5814774	5816892	3		5.29168	12.9888	Cytoplasm.	thio	119
XP_003545643.1	GmTrx96	XM_003545595.5	LOC100788702	PDI-1-1	NC_038250.2	14	28854925	28860209	11		5.27745	55.8334	Endoplasmic reticulum.	thio, thio_like	496
XP_003544787.1	GmTrx93	XM_003544739.5	LOC100782846	TTL	NC_038250.2	14	43445203	43449012	7		9.4958	77.2082	Nucleus.	thio, TPR	694
XP_003545033.1	GmTrx95	XM_003544985.5	LOC100781586	PLP3	NC_038250.2	14	49290442	49293153	9		5.54368	26.1273	Nucleus.	thio	231
XP_003545009.1	GmTrx94	XM_003544961.5	LOC100814030	CDSP32	NC_038250.2	14	49614648	49615879	1		6.32417	33.1706	Chloroplast.	thio	292
NP_001238717.1	GmTrx43	NM_001251788.1	LOC100526845	PDI-1-6	NC_038251.2	15	1244599	1249468	12		4.89144	58.8326	Chloroplast. Cytoplasm.	thio, thio_like	523
NP_001238632.1	GmTrx41	NM_001251703.2	LOC100499960	PDI-5-1	NC_038251.2	15	3621192	3623660	5		4.82691	16.0081	Chloroplast.	thio	141
NP_001235589.1	GmTrx04	NM_001248660.1	LOC100500012	h III	NC_038251.2	15	4816920	4819468	3		4.61043	13.6735	Cytoplasm.	thio	124
NP_001347343.1	GmTrx55	NM_001360414.1	LOC100799978	APR3	NC_038251.2	15	8519158	8522570	5		6.77966	52.2354	Chloroplast.	thio, PPRed	472
XP_003548734.2	GmTrx97	XM_003548686.5	LOC100785551	APR5	NC_038252.2	16	3752403	3757923	4		9.06736	32.4083	Chloroplast.	thio	285
XP_003548763.1	GmTrx98	XM_003548715.5	LOC100816892	Lilium	NC_038252.2	16	3965071	3967633	4		9.43324	33.0082	Chloroplast.	thio	299	DEG
XP_003548940.1	GmTrx99	XM_003548892.1	LOC100791909	APR5	NC_038252.2	16	31628927	31631089	4		7.87462	18.2739	Chloroplast. Nucleus.	thio	160
XP_040866787.1	GmTrx122	XM_041010853.1	LOC100790322	h III	NC_038252.2	16	37979799	37984598	7		5.52796	16.3495	Cytoplasm.	thio	145
NP_001341704.1	GmTrx54	NM_001354775.1	LOC100499871	h I	NC_038253.2	17	40919186	40921408	3		4.76266	13.3763	Cytoplasm.	thio	123
XP_003551992.1	GmTrx100	XM_003551944.4	LOC100810192	h II	NC_038254.2	18	17031446	17033474	3		7.79375	13.967	Cytoplasm.	thio	121
XP_003552324.1	GmTrx101	XM_003552276.5	LOC100813401	h III	NC_038254.2	18	50579965	50584363	5		4.9999	15.7167	Cytoplasm.	thio	139	DEG
NP_001236670.1	GmTrx22	NM_001249741.1	LOC100306555	F	NC_038254.2	18	53420383	53423137	3		8.95193	19.6085	Chloroplast.	thio	179
NP_001235291.1	GmTrx02	NM_001248362.2	LOC100306454	h II	NC_038254.2	18	54435270	54436234	3	clustered	5.25338	15.5254	Chloroplast.	thio	140
NP_001236481.1	GmTrx19	NM_001249552.3	LOC100305773	h II	NC_038254.2	18	54439080	54440350	3	clustered	5.65529	14.7167	Cytoplasm.	thio	128
XP_003552507.1	GmTrx102	XM_003552459.5	LOC100527508	h II	NC_038254.2	18	54442062	54442965	3	clustered	5.35051	14.7196	Cytoplasm.	thio	133
NP_001276128.1	GmTrx51	NM_001289199.1	LOC100784901	Lilium	NC_038255.2	19	36741274	36743602	4		9.25334	27.4331	Chloroplast.	thio	248
XP_003554021.1	GmTrx103	XM_003553973.5	LOC100795848	APR5	NC_038255.2	19	37194352	37199815	4		9.63648	31.8758	Chloroplast.	thio	281
XP_003554219.1	GmTrx104	XM_003554171.4	LOC100811965	WCRKC	NC_038255.2	19	41405131	41407936	5		8.93773	21.9703	Chloroplast.	thio	188
NP_001235403.1	GmTrx03	NM_001248474.2	LOC100305694	WCGVC	NC_038255.2	19	44770739	44771990	3		6.40959	15.1089	Cytoplasm.	thio	133
XP_006604788.1	GmTrx114	XM_006604725.4	LOC100795843	HCF164	NC_038255.2	19	48462806	48478766	28	clustered	5.51516	116.608	Chloroplast. Cytoplasm. Mitochondrion. Nucleus.	thio_like, NHL, HDLH	1067
NP_001236313.1	GmTrx15	NM_001249384.1	PDIS-2	PDIA6	NC_038255.2	19	48545251	48548895	11	clustered	5.9829	39.8201	Endoplasmic reticulum.	thio, ER	362
NP_001237351.2	GmTrx26	NM_001250422.2	LOC100306601	X	NC_038256.2	20	34615877	34626454	2		8.3477	19.9628	Chloroplast.	thio	181
NP_001238440.1	GmTrx39	NM_001251511.1	PDIQ-1A	QSOX2	NC_038256.2	20	36688901	36695212	12		8.16682	58.2408	Chloroplast.	thio, ERV1	516
XP_003555977.1	GmTrx105	XM_003555929.4	LOC100812734	TXNDC9	NC_038256.2	20	37155577	37157054	3		5.43187	24.4354	Nucleus.	thio	213
XP_006606001.1	GmTrx115	XM_006605938.3	LOC102663369	QSOX2	NC_038256.2	20	37440129	37443967	7		5.46502	24.1642	Cytoplasm. Nucleus.	thio	215
NP_001237908.1	GmTrx33	NM_001250979.2	LOC100500683	Y	NC_038256.2	20	40524180	40526898	5		8.99093	19.4342	Chloroplast.	thio	175
XP_003556360.1	GmTrx106	XM_003556312.5	LOC100794809	HCF164	NC_038256.2	20	44106132	44109754	2		8.99374	21.0887	Nucleus.	thio	190
