# Supplementary material for: Analysis of Thioredoxins and Glutaredoxins in Soybean: Evidence of Translational Regulation under Water Restriction
Source: Antioxidants (Basel). 2022 Aug 21;11(8):1622. doi: 10.3390/antiox11081622 (PMC9405309; doi:10.3390/antiox11081622)
Supplement: Supplementary file 1 [file antioxidants-11-01622-s001.zip › Table S2.xlsx]

## Sheet: GmGrx
ProtID_grx	GmGrx	TranscID_Grx	GeneID	Class	Chromosome	Chromosome #	pb_start	pb_end	# Exons	Arrangement in chromosomes	pI	pmw_gs_mol	Localization	Domain	Length (aa)	Status
XP_003516960.3	GmGrx25	XM_003516912.5	LOC100790493	CGFS	NC_016088.4	1	41801428	41804028	2		8.17403	35.4799	Chloroplast.	gluta	320
NP_001235231.1	GmGrx02	NM_001248302.2	LOC100527634	CxYC	NC_016088.4	1	51939591	51940902	4		9.33986	14.3496	Chloroplast.	gluta	129
XP_006574874.1	GmGrx67	XM_006574811.4	LOC100797942	CxYC	NC_016089.4	2	8619657	8620400	1		8.42888	15.5181	Chloroplast.	gluta	139
NP_001238158.1	GmGrx16	NM_001251229.1	LOC100500442	CCxS	NC_016089.4	2	16148387	16149147	1	Clustered	7.71838	10.9468	Chloroplast.	gluta	101
XP_006575104.1	GmGrx68	XM_006575041.3	LOC100810325	CCxS	NC_016089.4	2	16157962	16158702	1	Clustered	8.49098	11.248	Chloroplast.	gluta	102
XP_006575105.1	GmGrx69	XM_006575042.4	LOC100811394	CCxS	NC_016089.4	2	16173276	16173832	1	Clustered	7.75639	11.2822	Chloroplast.	gluta	102
XP_025981755.1	GmGrx86	XM_026125970.2	LOC100788402	4CxxC	NC_016089.4	2	38552947	38554017	1		8.13984	30.6812	Chloroplast.	gluta	270
XP_003518317.1	GmGrx26	XM_003518269.5	LOC100810320	4CxxC	NC_016089.4	2	43540196	43541791	1		8.4707	31.3114	Chloroplast.	gluta	281
XP_003518433.1	GmGrx27	XM_003518385.5	LOC100791927	4CxxC	NC_016089.4	2	46742669	46744679	1		9.33071	33.587	Chloroplast.	gluta	301
XP_003521443.1	GmGrx30	XM_003521395.4	LOC100813775	UNK	NC_016090.4	3	1974012	1980229	6		6.00173	71.6847	Chloroplast.	gluta, DEP, DUF547	629
XP_003520429.1	GmGrx28	XM_003520381.5	LOC100792650	CGFS	NC_016090.4	3	7799519	7802113	2		6.15029	32.2744	Chloroplast.	gluta	295
NP_001304436.1	GmGrx23	NM_001317507.1	LOC100802893	4CxxC	NC_016090.4	3	35610334	35612081	1		7.87198	48.2004	Nucleus.	gluta	440
NP_001241249.1	GmGrx21	NM_001254320.2	LOC100781497	4CxxC	NC_016090.4	3	41774700	41776191	1		8.86584	44.7231	Chloroplast.	gluta	398
XP_003520720.1	GmGrx29	XM_003520672.4	LOC100812335	4CxxC	NC_016090.4	3	42348842	42351857	2		7.85798	29.7369	Chloroplast.	gluta	264
NP_001235876.1	GmGrx07	NM_001248947.2	LOC100305984	CCxS	NC_016090.4	3	42834953	42835748	2	Clustered	6.25859	10.9938	Chloroplast.	gluta	101
XP_006576146.1	GmGrx70	XM_006576083.3	LOC100305984	CCxS	NC_016090.4	3	42834953	42835748	2	Clustered	6.25859	10.9938	Chloroplast.	gluta	101
XP_003521537.1	GmGrx31	XM_003521489.4	LOC100819447	CCxS	NC_016090.4	3	42837712	42838365	1	Clustered	7.67562	11.1569	Chloroplast.	gluta	102
XP_003521539.1	GmGrx32	XM_003521491.5	LOC100820510	CCxS	NC_016090.4	3	42850134	42850840	1	Clustered	7.78793	11.0659	Chloroplast.	gluta	102
XP_003521540.1	GmGrx33	XM_003521492.5	LOC100775606	CCxS	NC_016090.4	3	42856331	42857404	1	Clustered	8.93176	11.3183	Chloroplast.	gluta	105
XP_040870751.1	GmGrx89	XM_041014817.1	LOC100791969	CCxS	NC_016091.4	4	4197127	4198474	2		5.35055	16.9154	Chloroplast. Mitochondrion.	gluta	160
XP_003522948.1	GmGrx34	XM_003522900.5	LOC100811108	4CxxC	NC_016091.4	4	23071632	23073373	2		8.22212	29.2011	Chloroplast. Nucleus.	gluta	257
XP_003523454.1	GmGrx35	XM_003523406.5	LOC100813076	UNK	NC_016091.4	4	50618305	50623685	3		9.12278	14.8441	Chloroplast. Golgi apparatus. Nucleus.	gluta_like	138
XP_003524152.1	GmGrx36	XM_003524104.4	LOC100818945	CCxS	NC_038241.2	5	33663117	33663701	1		7.00271	12.6047	Chloroplast.	gluta	120
XP_003525338.1	GmGrx37	XM_003525290.5	LOC100809536	4CxxC	NC_038241.2	5	39868884	39870135	1		7.93802	37.4884	Chloroplast.	gluta	337	DEG
XP_003526012.1	GmGrx38	XM_003525964.5	LOC100780137	CCxS	NC_038242.2	6	3942760	3943942	1		4.74274	14.831	Chloroplast.	gluta	140	DEG
XP_003527918.1	GmGrx39	XM_003527870.4	LOC100820242	UNK	NC_038242.2	6	8585610	8589842	7		4.85619	83.745	Chloroplast.	gluta, DEP, DUF547	745
NP_001237056.1	GmGrx12	NM_001250127.2	LOC100306069	UNK	NC_038242.2	6	8990692	8993159	3		8.84293	14.751	Chloroplast. Golgi apparatus. Nucleus.	gluta_like	137
XP_014632252.1	GmGrx84	XM_014776766.3	LOC100791335	CxYC	NC_038242.2	6	45353160	45354388	1		9.48394	18.066	Chloroplast.	gluta	164
NP_001235171.1	GmGrx01	NM_001248242.1	LOC100527118	CCxS	NC_038242.2	6	47182662	47183363	1		6.3611	18.5511	Chloroplast.	gluta	172	DEG
NP_001236843.1	GmGrx11	NM_001249914.1	LOC100500103	CGFS	NC_038243.2	7	2557652	2560069	6		6.7205	17.8522	Chloroplast.	gluta	161
XP_003529977.1	GmGrx41	XM_003529929.4	LOC100810111	UNK	NC_038243.2	7	7317718	7323537	6		6.33395	71.9511	Chloroplast.	gluta, DEP, DUF547	633
XP_006584039.1	GmGrx71	XM_006583976.4	LOC100790463	CCxS	NC_038243.2	7	43170789	43171709	1	Clustered	7.71138	11.125	Chloroplast.	gluta	102
XP_003529587.1	GmGrx40	XM_003529539.4	LOC100790980	S10	NC_038243.2	7	43179547	43180299	1	Clustered	9.02285	11.1882	Chloroplast.	gluta	102
NP_001239943.1	GmGrx19	NM_001253014.2	LOC100780345	4CxxC	NC_038244.2	8	4056076	4057202	1		7.45584	29.2757	Chloroplast.	gluta	270
NP_001238672.1	GmGrx18	NM_001251743.2	LOC100527610	CGFS	NC_038244.2	8	17068902	17071269	6		5.8828	17.9052	Chloroplast.	gluta	161
NP_001241506.1	GmGrx22	NM_001254577.2	LOC100777703	CxYC	NC_038245.2	9	5864480	5867059	4		6.58098	14.6306	Chloroplast.	gluta	133
XP_003535021.1	GmGrx42	XM_003534973.3	LOC100797192	CCxS	NC_038245.2	9	10851888	10852298	1		6.3861	14.5789	Chloroplast.	gluta	136
XP_006587757.1	GmGrx72	XM_006587694.4	LOC100791030	4CxxC	NC_038245.2	9	46565175	46567441	2		4.81065	50.9107	Nucleus.	gluta	458
NP_001235817.1	GmGrx06	NM_001248888.2	LOC100305724	CGFS	NC_038245.2	9	47633704	47636459	3		8.60934	19.6825	Chloroplast.	gluta	177
XP_025979670.2	GmGrx85	XM_026123885.2	LOC100784667	UNK	NC_038245.2	9	49976366	49982558	6		8.80998	68.8115	Chloroplast.	gluta, DEP, DUF547	608
XP_014618387.1	GmGrx82	XM_014762901.3	LOC106794948	CCxC	NC_038246.2	10	1800441	1801494	1	Clustered	8.47449	11.3232	Chloroplast.	gluta	105
XP_014618274.1	GmGrx81	XM_014762788.3	LOC106794875	CCxS	NC_038246.2	10	1806759	1807262	1	Clustered	5.11448	10.4101	Chloroplast.	gluta	95
XP_040862228.1	GmGrx87	XM_041006294.1	LOC100816947	CCxS	NC_038246.2	10	1813490	1814786	1	Clustered	7.75639	11.2362	Chloroplast.	gluta	102
NP_001238068.1	GmGrx15	NM_001251139.3	LOC100305876	CCxS	NC_038246.2	10	1825208	1825932	1	Clustered	8.49098	11.2621	Chloroplast.	gluta	102	DEG
NP_001237832.1	GmGrx14	NM_001250903.2	LOC100527558	CCxS	NC_038246.2	10	1835971	1836693	2	Clustered	7.66544	10.9008	Chloroplast.	gluta	101
NP_001238538.1	GmGrx17	NM_001251609.1	LOC100305906	CxYC	NC_038246.2	10	3715047	3717318	4		9.21183	17.9377	Chloroplast.	gluta	166
XP_006588876.2	GmGrx73	XM_006588813.3	LOC100791955	4CxxC	NC_038246.2	10	9973387	9974190	1		7.88531	30.3647	Chloroplast.	gluta	267
XP_003555483.2	GmGrx65	XM_003555435.4	LOC100802583	4CxxC	NC_038246.2	10	42794633	42796010	1		6.00382	42.0804	Chloroplast. Nucleus.	gluta	369
NP_001236681.1	GmGrx10	NM_001249752.2	LOC100500348	CxYC	NC_038247.2	11	5378518	5379796	4		9.06147	14.3515	Chloroplast.	gluta	129
XP_006591248.1	GmGrx74	XM_006591185.4	LOC100805215	4CxxC	NC_038247.2	11	21375658	21397949	2		9.29761	26.1287	Chloroplast.	gluta	232
XP_003537494.1	GmGrx43	XM_003537446.5	LOC100807688	4CxxC	NC_038247.2	11	37659238	37660361	1		9.38472	25.7763	Chloroplast. Nucleus.	gluta	229	DEG
NP_001235378.1	GmGrx03	NM_001248449.2	LOC100306716	CCxS	NC_038248.2	12	12596838	12597679	1		5.8246	18.7384	Chloroplast.	gluta	173
NP_001240908.1	GmGrx20	NM_001253979.2	LOC100792704	CCxS	NC_038248.2	12	38182475	38183358	1		7.88825	17.7522	Chloroplast.	gluta	160	DEG
XP_003542446.3	GmGrx45	XM_003542398.5	LOC100798715	CxYC	NC_038249.2	13	23297180	23302449	5		9.59322	22.0878	Chloroplast.	gluta	200
XP_003541520.1	GmGrx44	XM_003541472.4	LOC100781748	CCxS	NC_038249.2	13	28242802	28243706	1		5.38853	14.1579	Chloroplast.	gluta	136
NP_001341821.1	GmGrx24	NM_001354892.1	LOC100784787	CGFS	NC_038249.2	13	28802261	28805388	3		5.24023	53.8073	Chloroplast.	thio, gluta	490
XP_003542829.1	GmGrx46	XM_003542781.5	LOC100779952	4CxxC	NC_038249.2	13	30631819	30633960	2		8.95114	30.1067	Chloroplast. Nucleus.	gluta	271
XP_006594493.1	GmGrx75	XM_006594430.3	LOC100784069	S10	NC_038249.2	13	32354392	32355175	1	Clustered	9.3001	11.191	Chloroplast.	gluta	102
XP_006594494.1	GmGrx76	XM_006594431.4	LOC100784603	CCxS	NC_038249.2	13	32359239	32360215	1	Clustered	7.67764	17.4214	Chloroplast.	gluta	154
XP_003543019.1	GmGrx47	XM_003542971.4	LOC100791149	CCxS	NC_038249.2	13	33919419	33920331	1		7.05072	14.0923	Chloroplast.	gluta	133	DEG
XP_003543318.1	GmGrx48	XM_003543270.5	LOC100818445	CCxS	NC_038249.2	13	38703127	38703999	1		8.57203	19.2801	Chloroplast.	gluta	174
NP_001237415.1	GmGrx13	NM_001250486.2	LOC100306093	CGFS	NC_038249.2	13	44365462	44368555	6		5.8828	18.0764	Chloroplast.	gluta	162
XP_003545225.1	GmGrx50	XM_003545177.5	LOC100816516	4CxxC	NC_038250.2	14	4497004	4498554	1		9.51403	26.8124	Chloroplast.	gluta	242	DEG
XP_014622093.1	GmGrx83	XM_014766607.3	LOC100778024	CCxS	NC_038250.2	14	9319352	9320069	1		5.55814	15.1733	Chloroplast.	gluta	141	DEG
XP_003544304.1	GmGrx49	XM_003544256.5	LOC100778900	4CxxC	NC_038250.2	14	47055784	47057596	1		8.4674	33.6409	Chloroplast.	gluta	302
XP_003546009.1	GmGrx51	XM_003545961.5	LOC100809924	CCxS	NC_038251.2	15	6022607	6023933	1		6.27358	14.2065	Chloroplast.	gluta	133
XP_003546092.1	GmGrx52	XM_003546044.4	LOC100810642	CCxS	NC_038251.2	15	7489833	7490747	1	Clustered	6.88794	11.191	Chloroplast.	gluta	102
XP_003546093.1	GmGrx53	XM_003546045.5	LOC100811183	S10	NC_038251.2	15	7493898	7494961	1	Clustered	9.3001	11.173	Chloroplast.	gluta	102
NP_001235472.2	GmGrx04	NM_001248543.3	LOC100305955	CxYC	NC_038251.2	15	15014318	15016804	4		5.93467	14.8588	Chloroplast.	gluta	134
XP_003547580.1	GmGrx55	XM_003547532.5	LOC100775537	CCxS	NC_038251.2	15	22852022	22852669	1		6.88716	13.9643	Chloroplast.	gluta	132
XP_003546721.1	GmGrx54	XM_003546673.5	LOC100792411	4CxxC	NC_038251.2	15	45358791	45360947	2		8.85593	29.9246	Chloroplast.	gluta	267
XP_003548512.1	GmGrx56	XM_003548464.5	LOC100808865	CxYC	NC_038252.2	16	5093283	5094036	1		6.88449	14.2326	Chloroplast.	gluta	134
NP_001236480.1	GmGrx09	NM_001249551.2	LOC100305517	CxYC	NC_038252.2	16	7233446	7235736	4		6.04954	11.2978	Chloroplast.	gluta	107
XP_003550174.1	GmGrx57	XM_003550126.5	LOC100815509	CCxS	NC_038253.2	17	1741085	1741868	1	Clustered	7.71173	11.107	Chloroplast.	gluta	102
XP_003552836.1	GmGrx58	XM_003552788.5	LOC100784009	4CxxC	NC_038254.2	18	1846862	1848032	1	Clustered	9.35243	25.7833	Chloroplast.	gluta	229
XP_003552941.1	GmGrx59	XM_003552893.5	LOC100812500	4CxxC	NC_038254.2	18	5197624	5203207	2		9.47789	26.7464	Chloroplast.	gluta	236
NP_001236264.1	GmGrx08	NM_001249335.2	LOC100500060	CGFS	NC_038254.2	18	53188894	53191599	3		8.60934	19.6765	Chloroplast.	gluta	177
XP_006602913.1	GmGrx77	XM_006602850.4	LOC100783996	4CxxC	NC_038254.2	18	54670823	54673199	1		4.79553	51.4023	Nucleus.	gluta	464
XP_006603016.1	GmGrx78	XM_006602953.4	LOC100818015	CxYC	NC_038254.2	18	56842931	56843816	1		8.42553	15.6462	Chloroplast.	gluta	142
XP_003554882.1	GmGrx64	XM_003554834.5	LOC100775994	4CxxC	NC_038255.2	19	2279423	2281673	1		4.70761	49.0209	Chloroplast. Cytoplasm. Nucleus.	gluta	437
XP_003553278.1	GmGrx60	XM_003553230.5	LOC100818026	CxYC	NC_038255.2	19	34536347	34537599	1		6.88449	14.1595	Chloroplast.	gluta	132
XP_003554133.1	GmGrx62	XM_003554085.5	LOC100811817	4CxxC	NC_038255.2	19	39682682	39684568	1		8.11648	46.6951	Chloroplast. Nucleus.	gluta	424	DEG
XP_040868600.1	GmGrx88	XM_041012666.1	LOC121174128	4CxxC	NC_038255.2	19	45710031	45712595	1		8.93706	44.8583	Chloroplast. Nucleus.	gluta	398	DEG
XP_003553622.1	GmGrx61	XM_003553574.5	LOC100791272	4CxxC	NC_038255.2	19	46326806	46328050	1		8.32981	28.8199	Chloroplast. Nucleus.	gluta	254
NP_001235478.1	GmGrx05	NM_001248549.2	LOC100499748	CCxS	NC_038255.2	19	46789137	46789921	2		6.80969	11.0339	Chloroplast.	gluta	101
XP_006604701.1	GmGrx79	XM_006604638.4	LOC100788094	CCxS	NC_038255.2	19	46791808	46792792	1	Clustered	7.67562	11.1569	Chloroplast.	gluta	102	DEG
XP_003554509.1	GmGrx63	XM_003554461.4	LOC100789514	CCxS	NC_038255.2	19	46804143	46804758	1	Clustered	7.76952	11.0869	Chloroplast.	gluta	102
XP_006604702.1	GmGrx80	XM_006604639.4	LOC100803979	CCxS	NC_038255.2	19	46811859	46813143	1	Clustered	8.79809	11.2763	Chloroplast.	gluta	105
XP_003556614.1	GmGrx66	XM_003556566.5	LOC100794983	UNK	NC_038256.2	20	510638	518036	6		6.71896	68.1736	Chloroplast.	gluta, DEP, DUF547	601
