# Supplementary material for: Analysis of Thioredoxins and Glutaredoxins in Soybean: Evidence of Translational Regulation under Water Restriction
Source: Antioxidants (Basel). 2022 Aug 21;11(8):1622. doi: 10.3390/antiox11081622 (PMC9405309; doi:10.3390/antiox11081622)
Supplement: Supplementary file 1 [file antioxidants-11-01622-s001.zip › Table S3.xlsx]

## Sheet: Hoja 1
Table Sx. General characteristics of the MEME motifs identified for GmTrx and GmGrx
Class	MOTIF ID	Sequence	Annotation	Width (amino acid)	Sites	E-value
GmTrx	MEME-1	YAPWCGPCKALAPIL	Thioredoxin	15	110	4.20E-801
GmTrx	MEME-2	YGVKAMPTFLLFKNG	Thioredoxin	15	122	1.70E-594
GmTrx	MEME-3	VLYCNRAACWSKLGQWEKSIEDCNQALHIQPNYTKALLRRAASNSKLERW	Tetratricopeptide repeat	50	10	6.00E-309
GmTrx	MEME-4	QVVLFHSTEEWEAHLDKAKETNKLVVVDF	Thioredoxin	29	37	1.20E-288
GmTrx	MEME-5	EKYPDVLFLKVDVDE	Unknown	15	109	2.00E-285
GmTrx	MEME-6	EVDKVVGANKDELQKKIEKHV	Unknown	21	49	1.00E-251
GmTrx	MEME-7	VVKKNRFVLVEFYAPWCGHCKKLAPEYEKAASE	Thioredoxin	33	14	4.70E-248
GmTrx	MEME-8	YRSNRAAALTGLGRLPEAVRECEEAVKLDPSYGRAHQRLATJYLRLGZVE	Tetratricopeptide repeat	50	10	3.90E-246
GmTrx	MEME-9	DPRNVEVAALVNNVRMVARARMRGNDLFKSEKFTEACSAYGEGLRHDPSN	Tetratricopeptide repeat	50	10	1.10E-217
GmTrx	MEME-10	NKCGDARKVGDWKSVLRETDAAIALGADSAPQVYACRAEALLKLHQIDDA	Tetratricopeptide repeat	50	10	4.40E-199
GmGrx	MEME-1	MDRVTRLVSEKPVVIFSKSSCCMCHVVKRLFCELGVNPTVHELDEDPEGK	Glutaredoxin	50	49	2.30E-1200
GmGrx	MEME-2	PAVFIGGKLIGGADEVMSLHESGELVPLL	Glutaredoxin	29	87	5.30E-1170
GmGrx	MEME-3	YFTSLRGVRKTFEDCNAVRSILRGFRVAVDERDVSMDSGFR	Glutaredoxin	41	25	5.80E-603
GmGrx	MEME-4	GVCDGCGDVRFVPCDECNGSCKVFTEKGG	Unknown	29	25	1.90E-324
GmGrx	MEME-5	CPECNENGLIRCPMC	Unknown	15	24	3.00E-188
GmGrx	MEME-6	EIEKALLRLGCQPSV	Glutaredoxin	15	40	2.80E-168
GmGrx	MEME-7	NVJEQLVKDNPVVVFMKGVPDFPQCGFSSLVVRILKHYNVPFESRNILED	Glutaredoxin	50	8	7.40E-121
GmGrx	MEME-8	EDRRHVDYEAISKSEEFRRYVNLTQDLQRVNLLELSENEKLAFFJNLYNA	DUF547	50	7	1.30E-96
GmGrx	MEME-9	KDAGALWL	Unknown	8	32	2.10E-96
GmGrx	MEME-10	VEIGKQLSKKHFIHHVFGENDFEEGNHFYRFLEHEPFIPKCFNFRGTTND	DEP domain	50	4	1.70E-90
